# Supplementary material for: Hexanuclear FeIII2CoIII2MII2(M = Cu, Ni, Mn) clusters based on Kläui's tripodal ligand and tricyanometalates: syntheses, structures and magnetic properties
Source: Royal Society of Chemistry journal article supplement (doi:10.1039/c0dt00954g), 2010-12-13
Supplement: c0dt00954g.pdf [file c0dt00954g.pdf]

*Electronic Supplementary Information*

**Hexanuclear Fe<sup>III</sup><sub>2</sub>Co<sup>III</sup><sub>2</sub>M<sup>II</sup><sub>2</sub> (M = Cu, Ni, Mn) Clusters Based on Kläui's Tripodal Ligand and Tricyanometalates: Syntheses, Structures and Magnetic Properties**

Ling-Chen Kang, Ming-Xia Yao, Xin Chen, Yi-Zhi Li, You Song, Jing-Lin Zuo\* and Xiao-Zeng You

*State Key Laboratory of Coordination Chemistry, School of Chemistry and Chemical Engineering, Nanjing National Laboratory of Microstructures, Nanjing University, Nanjing 210093, P. R. China.*

---

\* To whom correspondence should be addressed. Email: zuojl@nju.edu.cn. Fax: +86-25-83314502. Nanjing University.

**Table S1.** Selected bond lengths (Å) and angles (deg) for **1**

| <i>Bond lengths</i> |            |             |            |
|---------------------|------------|-------------|------------|
| Fe1–C1              | 1.924(4)   | Fe1–C2      | 1.910(4)   |
| Fe1–N8              | 1.962(3)   | Fe1–C3      | 1.925(5)   |
| Fe1–N6              | 1.987(3)   | Fe1–N4      | 1.966(3)   |
| Co1–P3              | 2.1507(14) | Co1–P1      | 2.1641(14) |
| Co1–P2              | 2.1684(17) | Cu1–N2      | 1.962(4)   |
| Cu1–N1              | 1.972(4)   | Cu1–O1      | 1.950(3)   |
| Cu1–O7              | 1.978(3)   | Cu1–O4      | 2.178(3)   |
| C1–N1               | 1.132(6)   | C2–N2#1     | 1.145(6)   |
| C3–N3               | 1.131(6)   |             |            |
| <i>Bond angles</i>  |            |             |            |
| P3–Co1–P1           | 88.74(6)   | P3–Co1–P2   | 90.32(6)   |
| P1–Co1–P2           | 93.22(6)   | O1–Cu1–N1   | 88.15(13)  |
| O1–Cu1–N2           | 165.95(16) | O1–Cu1–O7   | 89.00(13)  |
| N2–Cu1–N1           | 92.56(14)  | N1–Cu1–O7   | 170.14(15) |
| N2–Cu1–O7           | 87.94(13)  | N2–Cu1–O4   | 99.60(15)  |
| O1–Cu1–O4           | 94.25(14)  | O7–Cu1–O4   | 92.86(14)  |
| N1–Cu1–O4           | 96.76(15)  | N1–C1–Fe1   | 176.9(4)   |
| N2#1–C2–Fe1         | 179.7(4)   | N3–C3–Fe1   | 179.5(5)   |
| C1–N1–Cu1           | 173.1(4)   | C2#1–N2–Cu1 | 174.3(4)   |

Symmetry transformations used to generate equivalent atoms: #1  $-x + 1, -y + 1, -z$

**Table S2.** Selected bond lengths (Å) and angles (deg) for **2**

| <i>Bond lengths</i> |            |           |            |
|---------------------|------------|-----------|------------|
| Fe1–C1              | 1.908(4)   | Fe1–C2#1  | 1.906(4)   |
| Fe1–C3              | 1.942(4)   | Fe1–N4    | 2.008(3)   |
| Fe1–N6              | 1.997(4)   | Fe1–N8    | 1.992(3)   |
| Co1–P3              | 2.1125(12) | Co1–P1    | 2.1572(12) |
| Co1–P2              | 2.1914(12) | Cu1–N1    | 1.983(3)   |
| Cu1–N2              | 1.960(4)   | Cu1–O1    | 2.116(3)   |
| Cu1–O4              | 1.970(3)   | Cu1–O7    | 1.944(3)   |
| C1–N1               | 1.133(5)   | C2–N2     | 1.165(5)   |
| C3–N3               | 1.072(5)   |           |            |
| <i>Bond angles</i>  |            |           |            |
| P3–Co1–P1           | 94.15(5)   | P3–Co1–P2 | 87.95(5)   |
| P1–Co1–P2           | 87.94(12)  | O1–Cu1–O4 | 95.75(11)  |
| O1–Cu1–O7           | 94.29(11)  | O4–Cu1–O7 | 87.94(12)  |
| N1–Cu1–O1           | 96.12(13)  | N1–Cu1–O4 | 89.71(13)  |
| N1–Cu1–O7           | 169.50(13) | N2–Cu1–O1 | 99.91(12)  |
| N2–Cu1–O4           | 163.93(13) | N2–Cu1–O7 | 87.30(13)  |
| N1–Cu1–N2           | 92.20(14)  | N1–C1–Fe1 | 177.9(4)   |

|             |          |           |          |
|-------------|----------|-----------|----------|
| N2–C2–Fe1#1 | 178.8(3) | N3–C3–Fe1 | 177.3(4) |
| C1–N1–Cu1   | 172.3(3) | C2–N2–Cu1 | 172.8(3) |

Symmetry transformations used to generate equivalent atoms: #1  $-x + 1/2, -y + 1/2, z$

**Table S3.** Selected bond lengths (Å) and angles (deg) for **3**

| <i>Bond lengths</i> |           |             |          |
|---------------------|-----------|-------------|----------|
| Fe1–C3              | 1.913(9)  | Fe1–C2      | 1.913(7) |
| Fe1–N4              | 1.951(6)  | Fe1–C1      | 1.931(7) |
| Fe1–N6              | 1.966(5)  | Fe1–N8      | 1.958(6) |
| Co1–P3              | 2.155(2)  | Co1–P1      | 2.156(2) |
| Co1–P2              | 2.162(2)  | Cu1–N2      | 1.961(6) |
| Cu1–N1              | 1.969(6)  | Cu1–O7      | 1.947(4) |
| Cu1–O1              | 1.948(5)  | Cu1–O4      | 2.219(5) |
| C1–N1               | 1.131(8)  | C2–N2#1     | 1.168(8) |
| C3–N3               | 1.148(10) |             |          |
| <i>Bond angles</i>  |           |             |          |
| P3–Co1–P1           | 92.16(9)  | P3–Co1–P2   | 92.18(9) |
| P1–Co1–P2           | 89.53(8)  | O1–Cu1–O4   | 91.6(2)  |
| O1–Cu1–O7           | 90.7(2)   | O4–Cu1–O7   | 92.9(2)  |
| N1–Cu1–O1           | 86.9(2)   | N1–Cu1–O4   | 103.2(2) |
| N1–Cu1–O7           | 163.8(2)  | N2–Cu1–O1   | 169.4(3) |
| N2–Cu1–O4           | 98.9(2)   | N2–Cu1–O7   | 88.1(2)  |
| N1–Cu1–N2           | 91.3(2)   | N1–C1–Fe1   | 179.3(6) |
| N2#1–C2–Fe1         | 178.8(6)  | N3–C3–Fe1   | 177.7(8) |
| C1–N1–Cu1           | 172.2(6)  | C2#1–N2–Cu1 | 174.8(6) |

Symmetry transformations used to generate equivalent atoms: #1  $-x, -y, -z + 1$

**Table S4.** Selected bond lengths (Å) and angles (deg) for **4**

| <i>Bond lengths</i> |            |            |            |
|---------------------|------------|------------|------------|
| Fe1–C1              | 1.916(5)   | Fe1–C2     | 1.917(5)   |
| Fe1–C3              | 1.929(5)   | Fe1–N4     | 1.973(4)   |
| Fe1–N6              | 1.976(4)   | Fe1–N8     | 1.976(4)   |
| Co(1)–P(3)          | 2.1566(17) | Co(1)–P(1) | 2.1573(17) |
| Co(1)–P(2)          | 2.1596(18) | Ni1–N1     | 2.061(4)   |
| Ni1–N2              | 2.046(4)   | Ni1–N10    | 2.138(5)   |
| Ni1–O1              | 2.034(3)   | Ni1–O4     | 2.071(3)   |
| Ni1–O7              | 2.053(3)   | C1–N1      | 1.141(5)   |
| C2–N2#1             | 1.142(6)   | C3–N3      | 1.130(6)   |
| <i>Bond angles</i>  |            |            |            |
| P3–Co1–P1           | 90.25(6)   | P3–Co1–P2  | 89.78(6)   |
| P1–Co1–P2           | 90.91(7)   | O1–Ni1–O4  | 89.94(13)  |

|             |            |             |            |
|-------------|------------|-------------|------------|
| O1–Ni1–O7   | 88.90(14)  | O4–Ni1–O7   | 89.89(13)  |
| N1–Ni1–O1   | 89.52(14)  | N1–Ni1–O4   | 89.55(14)  |
| N1–Ni1–O7   | 178.33(14) | N2–Ni1–O1   | 176.74(15) |
| N2–Ni1–O4   | 92.33(15)  | N2–Ni1–O7   | 88.76(15)  |
| N10–Ni1–O1  | 91.20(16)  | N10–Ni1–O4  | 177.90(15) |
| N10–Ni1–O7  | 91.89(16)  | N1–Ni1–N2   | 92.84(15)  |
| N1–Ni1–N10  | 88.70(17)  | N2–Ni1–N10  | 86.60(17)  |
| N1–C1–Fe1   | 178.6(4)   | N2#1–C2–Fe1 | 177.2(4)   |
| N3–C3–Fe1   | 177.8(5)   | C1–N1–Ni1   | 175.2(4)   |
| C2#1–N2–Ni1 | 171.8(4)   |             |            |

Symmetry transformations used to generate equivalent atoms: #1  $-x + 1, -y + 1, -z$

**Table S5.** Selected bond lengths (Å) and angles (deg) for **5**

|                     |           |             |           |
|---------------------|-----------|-------------|-----------|
| <b>Bond lengths</b> |           |             |           |
| Fe1–C1              | 1.906(8)  | Fe1–C2      | 1.895(8)  |
| Fe1–C3              | 1.907(8)  | Fe1–N8      | 1.964(5)  |
| Fe1–N6              | 1.964(6)  | Fe1–N4      | 1.972(6)  |
| Co1–P2              | 2.163(3)  | Co1–P3      | 2.164(3)  |
| Co1–P1              | 2.165(2)  | Mn1–O4      | 2.130(5)  |
| Mn1–O7              | 2.146(5)  | Mn1–O1      | 2.160(5)  |
| Mn1–N2              | 2.215(7)  | Mn1–N1      | 2.218(7)  |
| Mn1–N10             | 2.362(7)  | C1–N1       | 1.152(8)  |
| C2–N2#1             | 1.151(8)  | C3–N3       | 1.150(8)  |
| <b>Bond angles</b>  |           |             |           |
| P2–Co1–P3           | 90.79(10) | P2–Co1–P1   | 92.94(10) |
| P3–Co1–P1           | 89.85(10) | O4–Mn1–O7   | 88.69(19) |
| O4–Mn1–O1           | 85.8(2)   | O7–Mn1–O1   | 88.5(2)   |
| O4–Mn1–N2           | 171.2(2)  | O7–Mn1–N2   | 97.7(2)   |
| O1–Mn1–N2           | 88.3(2)   | O4–Mn1–N1   | 90.9(2)   |
| O7–Mn1–N1           | 95.9(2)   | O1–Mn1–N1   | 174.5(2)  |
| N2–Mn1–N1           | 94.5(2)   | O4–Mn1–N10  | 89.7(2)   |
| O7–Mn1–N10          | 174.5(2)  | O1–Mn1–N10  | 86.2(2)   |
| N2–Mn1–N10          | 83.4(2)   | N1–Mn1–N10  | 89.4(2)   |
| N1–C1–Fe1           | 177.6(7)  | N2#1–C2–Fe1 | 177.0(7)  |
| N3–C3–Fe1           | 175.9(7)  | C1–N1–Mn1   | 172.3(6)  |
| C2#1–N2–Mn1         | 168.9(6)  |             |           |

Symmetry transformations used to generate equivalent atoms: #1  $-x + 1, -y + 2, -z + 2$

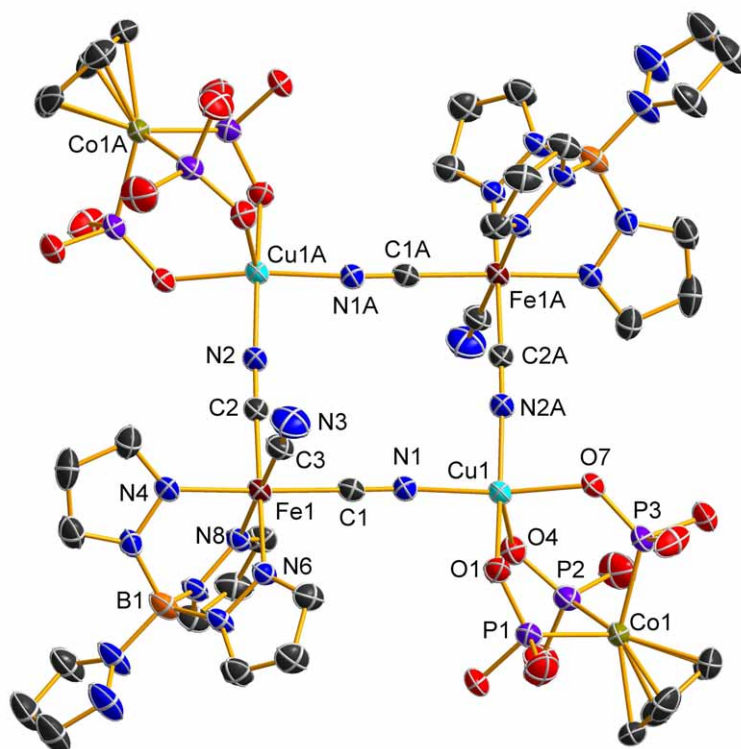

**Fig. S1** ORTEP view of the neutral hexanuclear cluster of **3** with an atom-numbering scheme at the 30% probability level. Ethyl groups of the phosphates and H atoms are omitted for clarity.

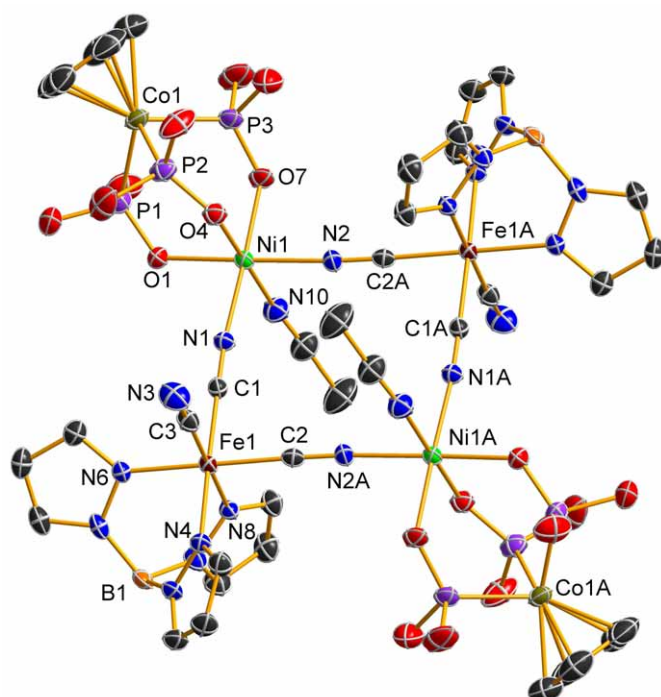

**Fig. S2** ORTEP view of the neutral hexanuclear clusters of **4** with an atom-numbering scheme at the 30% probability level. Ethyl groups of the phosphates and H atoms are omitted for clarity.

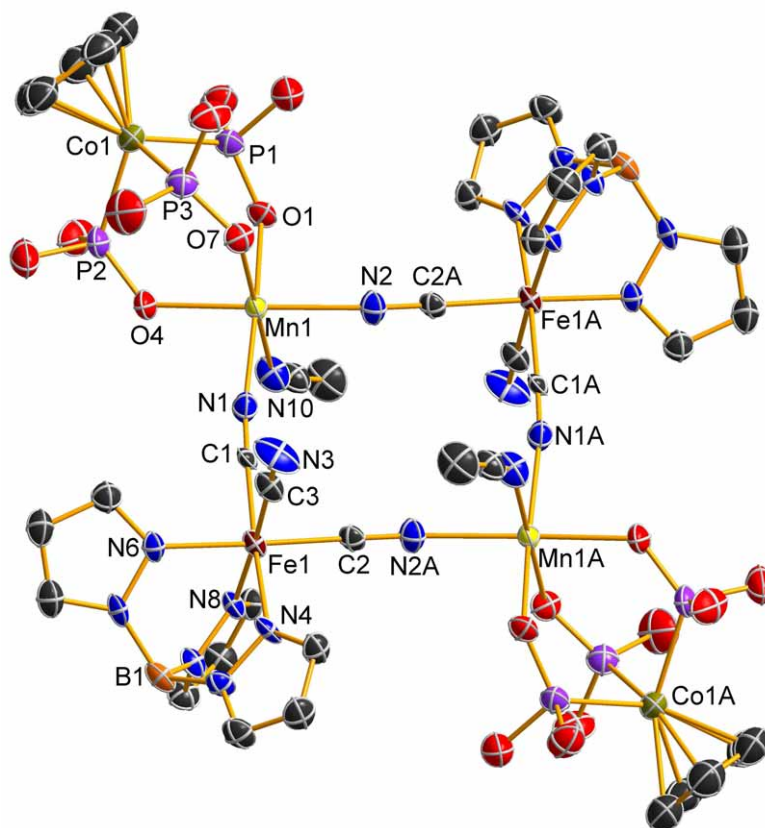

**Fig. S3** ORTEP view of the neutral hexanuclear clusters of **5** with an atom-numbering scheme at the 30% probability level. Ethyl groups of the phosphates and H atoms are omitted for clarity.

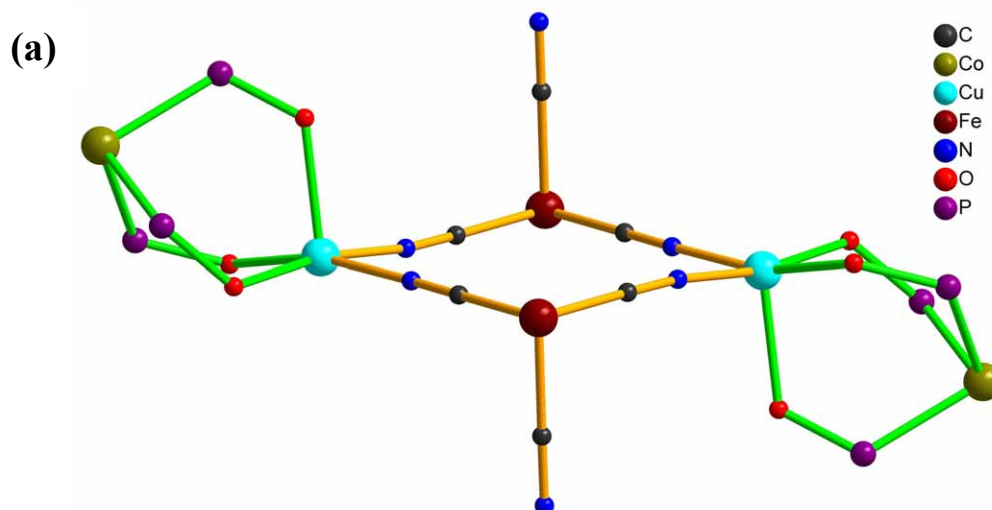

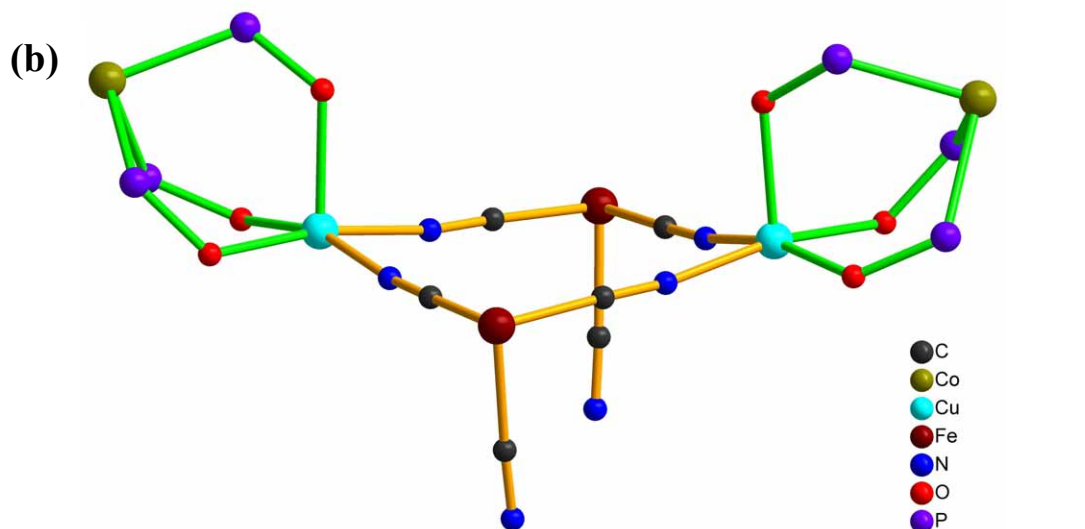

**Fig. S4** (a) A view to show the *trans* conformation of the  $L_{CoEt}$  units in complex **1**.  
(b) A view to show the *cis* conformation of the  $L_{CoEt}$  units in complex **2**.

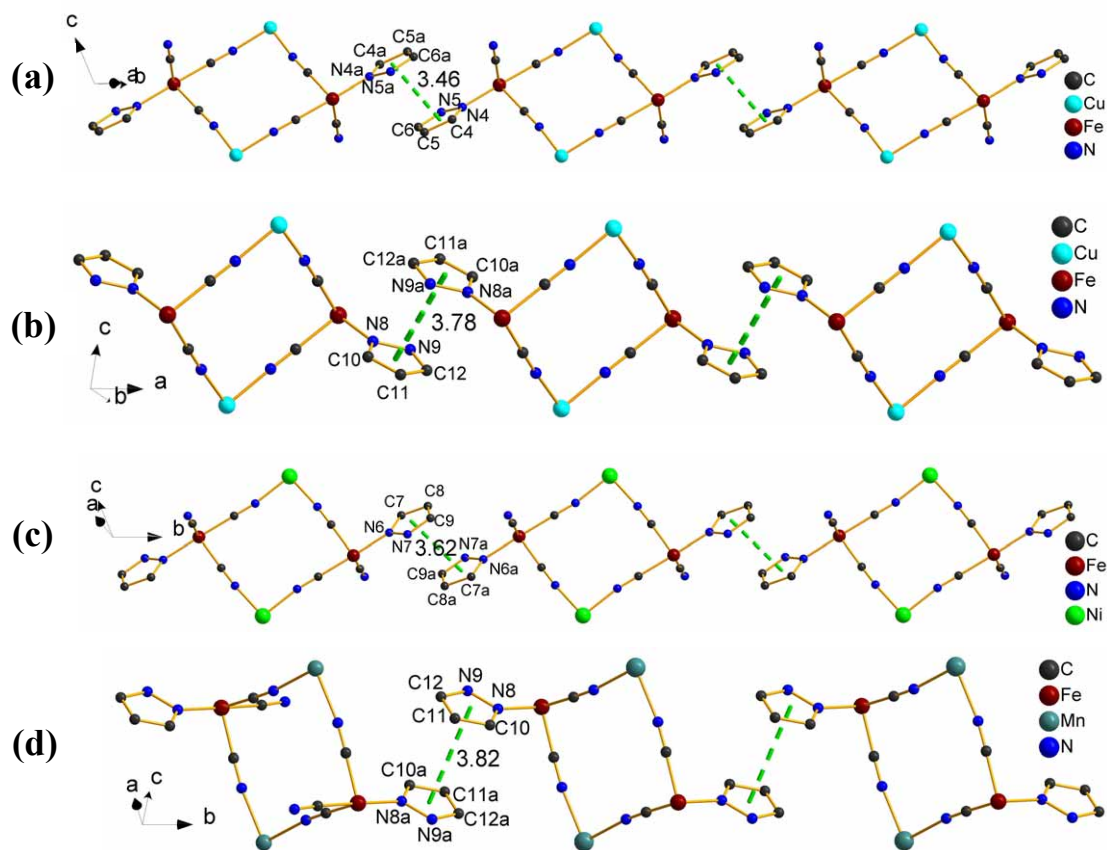

**Fig. S5** A view to show the chains formed by  $\pi$ - $\pi$  interactions (green dash lines) of the nearby pyrazole rings in complexes **1** (a), **3** (b), **4** (c) and **5** (d).

**Table S6.** Centroid distances of  $\pi$ - $\pi$  stacking interactions between the pyrazole rings of complexes **1**, **3**, **4** and **5**.

| Complexes              | <b>1</b>  | <b>3</b>  | <b>4</b>   | <b>5</b>   |
|------------------------|-----------|-----------|------------|------------|
| Centroid distances (Å) | 3.4604(7) | 3.7772(7) | 3.6229(10) | 3.8232(14) |

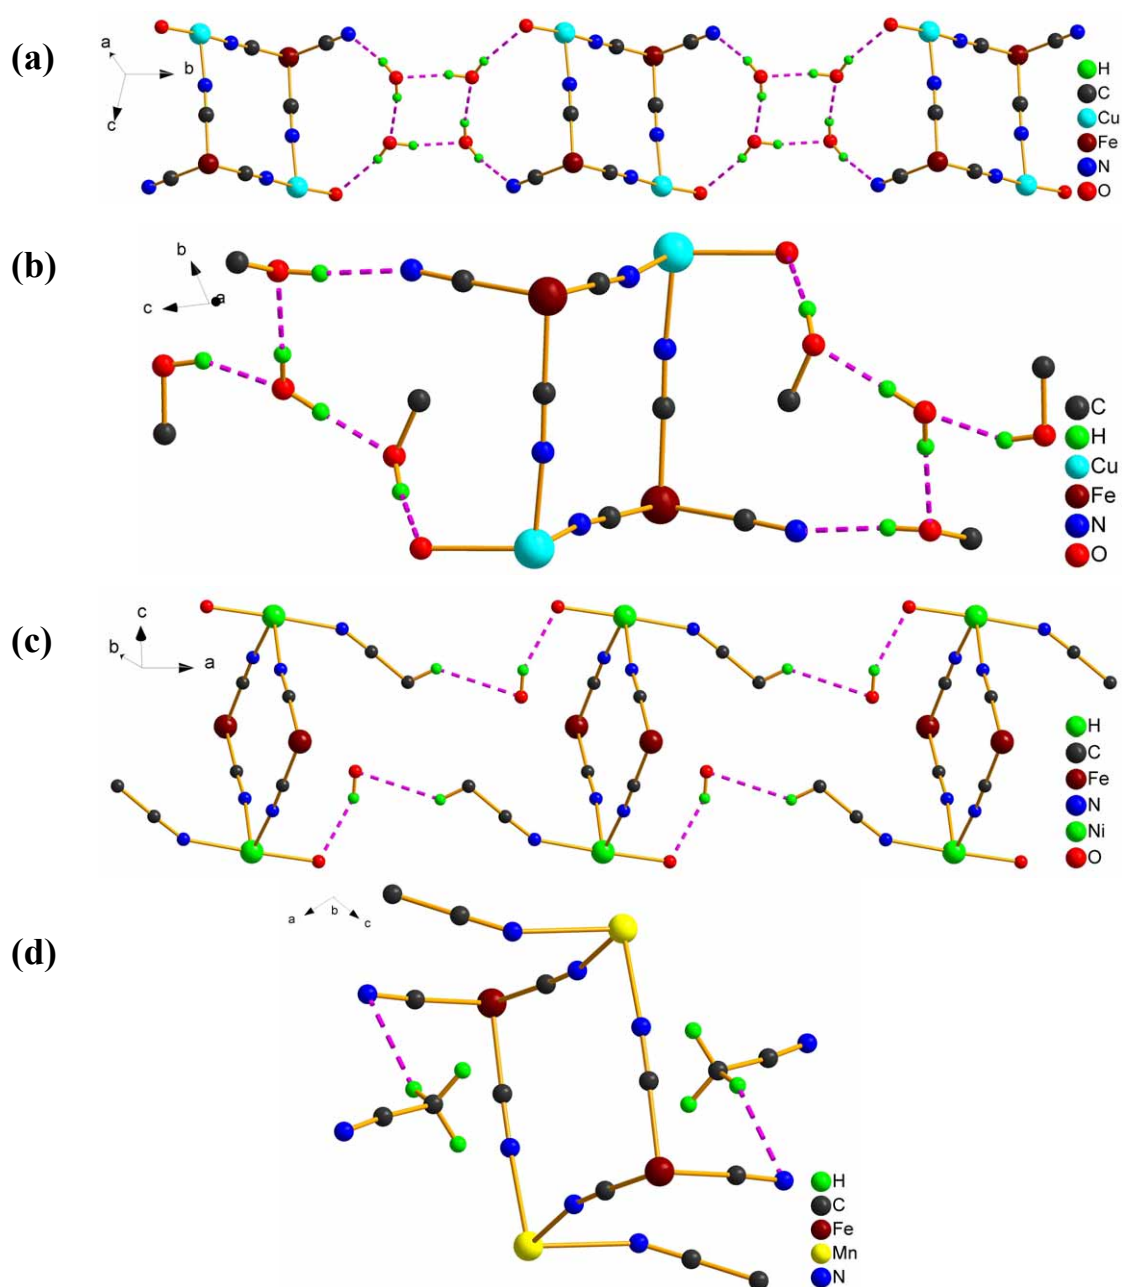

**Fig. S6** A view to show the hydrogen-bond interactions (pink dash lines) within complexes **1** (a), **3** (b), **4** (c) and **5** (d).
